# Supplementary material
Source: PubMed Central journal article supplement (PMC3993166)
Supplement: AEM.04133-13_zam008145255so1.pdf [file AEM.04133-13_zam008145255so1.pdf]

**TABLE S1.** Origins and typing data of the bacterial strains analysed in this study. <sup>a</sup> Seasons were grouped as follows: Winter-Spring (10 – 20 °C) and Summer-Autumn (21 – 30 °C). <sup>b</sup> (*E. coli* level according to the European regulation 854/2004). <sup>c</sup> No environmental information are available. <sup>d</sup> The nucleotide sequences of these strains were downloaded from GenBank.

| Strain             | Biochemical Identification | Structure groups                 | Source                               | Season <sup>a</sup> | Water temperature (°C) | Risk Level <sup>b</sup> | Area   | Depth of sampling (cm) | ST | gyrB | pyrH | recA | atpA |
|--------------------|----------------------------|----------------------------------|--------------------------------------|---------------------|------------------------|-------------------------|--------|------------------------|----|------|------|------|------|
| Vi_2               | V. vulnificus              | V. harveyi group                 | <i>C. gallina</i>                    | Winter              | 6-10                   | B                       | Sea    | > 200                  | 1  | 1    | 1    | 1    | 1    |
| Vi_9               | V. vulnificus              | V. harveyi group                 | <i>M. galloprovincialis</i>          | Winter              | 6-10                   | A                       | Sea    | > 200                  | 2  | 2    | 2    | 2    | 2    |
| Vi_10              | V. fluvialis               | V. anguillarum                   | <i>M. galloprovincialis</i>          | Winter              | 11-15                  | A                       | Sea    | > 200                  | 3  | 3    | 3    | 3    | 3    |
| Vi_11              | V. fluvialis               | V. anguillarum                   | <i>V. philippinarum</i>              | Winter              | 11-15                  | B                       | Lagoon | > 200                  | 4  | 4    | 4    | 4    | 4    |
| Vi_12              | V. fluvialis               | V. anguillarum                   | <i>V. philippinarum</i>              | Winter              | 6-10                   | B                       | Lagoon | 101 - 200              | 3  | 3    | 3    | 3    | 3    |
| Vi_13              | V. fluvialis               | V. anguillarum                   | <i>C. gallina</i>                    | Winter              | 6-10                   | B                       | Sea    | > 200                  | 5  | 5    | 5    | 5    | 5    |
| Vi_14              | V. fluvialis               | V. anguillarum                   | <i>Ensis</i> spp./ <i>Solen</i> spp. | Winter              | 6-10                   | B                       | Sea    | > 200                  | 6  | 6    | 4    | 6    | 6    |
| Vi_16              | V. mediterranei            | V. mediterranei / V. shilonii    | <i>V. philippinarum</i>              | Winter              | 6-10                   | B                       | Lagoon | 101 - 200              | 7  | 7    | 6    | 7    | 7    |
| Vi_18              | V. pelagius I              | V. splendidus                    | <i>M. galloprovincialis</i>          | Winter              | 11-15                  | A                       | Sea    | > 200                  | 8  | 8    | 7    | 8    | 8    |
| Vi_20              | V. nereis                  | Vi 20 group                      | <i>O. edulis</i>                     | Winter              | 11-15                  | B                       | Lagoon | 0 - 100                | 9  | 9    | 8    | 9    | 9    |
| Vi_21              | V. campbelli               | V. fischeri                      | <i>V. philippinarum</i>              | Winter              | 6-10                   | B                       | Lagoon | 101 - 200              | 10 | 10   | 9    | 10   | 10   |
| Vi_22              | V. anguillarum like        | V. anguillarum                   | <i>M. galloprovincialis</i>          | Winter              | 11-15                  | A                       | Sea    | > 200                  | 11 | 11   | 10   | 11   | 11   |
| Vi_23              | V. fluvialis               | V. anguillarum                   | <i>V. philippinarum</i>              | Spring              | 6-10                   | B                       | Lagoon | 0 - 100                | 12 | 4    | 11   | 4    | 12   |
| Vi_24              | V. fluvialis               | V. anguillarum                   | <i>V. philippinarum</i>              | Spring              | 6-10                   | B                       | Lagoon | 0 - 100                | 13 | 12   | 12   | 4    | 12   |
| Vi_25              | V. fluvialis               | V. anguillarum                   | <i>M. galloprovincialis</i>          | Spring              | 6-10                   | A                       | Sea    | > 200                  | 14 | 13   | 13   | 12   | 4    |
| Vi_26              | V. campbelli               | V. splendidus                    | <i>V. philippinarum</i>              | Spring              | 6-10                   | B                       | Lagoon | 0 - 100                | 15 | 14   | 14   | 13   | 13   |
| Vi_27 <sup>c</sup> | V. alginolyticus           | V. alginolyticus / V. diabolicus | -                                    | -                   | -                      | -                       | -      | -                      | 16 | 15   | 15   | 14   | 14   |
| Vi_28              | V. alginolyticus           | V. harveyi group                 | <i>V. philippinarum</i>              | Winter              | 6-10                   | B                       | Lagoon | 0 - 100                | 17 | 16   | 16   | 15   | 15   |
| Vi_29              | V. alginolyticus           | V. alginolyticus / V. diabolicus | <i>M. galloprovincialis</i>          | Winter              | 11-15                  | A                       | Sea    | > 200                  | 18 | 17   | 17   | 16   | 16   |
| Vi_31              | V. alginolyticus           | V. alginolyticus / V. diabolicus | <i>V. philippinarum</i>              | Winter              | 6-10                   | B                       | Lagoon | 101 - 200              | 19 | 15   | 15   | 17   | 14   |
| Vi_32              | V. alginolyticus           | V. alginolyticus / V. diabolicus | <i>C. gallina</i>                    | Winter              | 6-10                   | B                       | Sea    | > 200                  | 20 | 18   | 17   | 18   | 16   |
| Vi_33              | V. alginolyticus           | V. alginolyticus / V. diabolicus | <i>V. philippinarum</i>              | Winter              | 11-15                  | B                       | Lagoon | > 200                  | 21 | 19   | 18   | 19   | 17   |
| Vi_34              | V. alginolyticus           | V. alginolyticus / V. diabolicus | <i>M. galloprovincialis</i>          | Winter              | 11-15                  | A                       | Sea    | > 200                  | 22 | 20   | 19   | 20   | 17   |
| Vi_35              | V. alginolyticus           | V. alginolyticus / V. diabolicus | <i>M. galloprovincialis</i>          | Winter              | 11-15                  | A                       | Sea    | > 200                  | 23 | 21   | 19   | 21   | 17   |
| Vi_36              | V. alginolyticus           | V. alginolyticus / V. diabolicus | <i>M. galloprovincialis</i>          | Winter              | 6-10                   | A                       | Sea    | > 200                  | 24 | 22   | 20   | 22   | 16   |
| Vi_37              | V. parahaemolyticus        | V. alginolyticus / V. diabolicus | <i>V. philippinarum</i>              | Winter              | 6-10                   | B                       | Lagoon | 0 - 100                | 25 | 23   | 15   | 19   | 18   |
| Vi_38              | V. parahaemolyticus        | V. parahaemolyticus              | <i>V. philippinarum</i>              | Winter              | 6-10                   | B                       | Lagoon | 0 - 100                | 26 | 24   | 21   | 23   | 19   |
| Vi_39              | V. alginolyticus           | V. alginolyticus / V. diabolicus | <i>V. philippinarum</i>              | Winter              | 6-10                   | B                       | Lagoon | 101 - 200              | 27 | 25   | 19   | 17   | 17   |
| Vi_40 <sup>c</sup> | V. parahaemolyticus        | V. harveyi group                 | -                                    | -                   | -                      | -                       | -      | -                      | 28 | 26   | 22   | 24   | 20   |
| Vi_41              | V. spp.                    | V. harveyi group                 | <i>V. philippinarum</i>              | Winter              | 11-15                  | B                       | Lagoon | > 200                  | 29 | 27   | 23   | 25   | 21   |
| Vi_42              | V. spp.                    | V. harveyi group                 | <i>O. edulis</i>                     | Winter              | 11-15                  | B                       | Lagoon | 0 - 100                | 30 | 28   | 24   | 26   | 22   |
| Vi_43              | V. alginolyticus           | V. alginolyticus / V. diabolicus | <i>Ensis</i> spp./ <i>Solen</i> spp. | Winter              | 6-10                   | B                       | Sea    | > 200                  | 31 | 29   | 25   | 19   | 23   |
| Vi_44              | V. alginolyticus           | V. alginolyticus / V. diabolicus | <i>V. philippinarum</i>              | Winter              | 11-15                  | B                       | Lagoon | > 200                  | 32 | 30   | 25   | 27   | 23   |
| Vi_45              | V. spp.                    | V. harveyi group                 | <i>M. galloprovincialis</i>          | Winter              | 11-15                  | A                       | Sea    | > 200                  | 33 | 28   | 24   | 28   | 24   |
| Vi_46              | V. parahaemolyticus        | V. harveyi group                 | <i>V. philippinarum</i>              | Winter              | 11-15                  | B                       | Lagoon | > 200                  | 34 | 28   | 24   | 29   | 24   |
| Vi_47              | V. fluvialis               | V. anguillarum                   | <i>C. gallina</i>                    | Winter              | 6-10                   | B                       | Sea    | > 200                  | 5  | 5    | 5    | 5    | 5    |
| Vi_48              | V. fluvialis               | V. harveyi group                 | <i>V. philippinarum</i>              | Spring              | 11-15                  | B                       | Lagoon | > 200                  | 33 | 28   | 24   | 28   | 24   |
| Vi_49              | V. fluvialis               | V. harveyi group                 | <i>V. philippinarum</i>              | Spring              | 16-20                  | B                       | Lagoon | 101 - 200              | 33 | 28   | 24   | 28   | 24   |
| Vi_50              | V. fluvialis               | V. harveyi group                 | <i>V. philippinarum</i>              | Spring              | 16-20                  | B                       | Lagoon | 101 - 200              | 35 | 31   | 26   | 26   | 24   |
| Vi_51              | V. nereis                  | Vi 20 group                      | <i>V. philippinarum</i>              | Spring              | 6-10                   | B                       | Lagoon | 0 - 100                | 36 | 32   | 27   | 30   | 25   |
| Vi_52              | V. nereis                  | V. brasiliensis                  | <i>C. gallina</i>                    | Spring              | 6-10                   | A                       | Sea    | > 200                  | 37 | 33   | 28   | 31   | 26   |
| Vi_53              | V. splendidus              | V. splendidus                    | <i>V. philippinarum</i>              | Spring              | 6-10                   | B                       | Lagoon | 0 - 100                | 38 | 34   | 29   | 32   | 27   |
| Vi_54              | V. splendidus              | Vi 20 group                      | <i>V. philippinarum</i>              | Spring              | 16-20                  | B                       | Lagoon | 101 - 200              | 39 | 35   | 27   | 33   | 28   |
| Vi_55              | V. anguillarum like        | V. anguillarum                   | <i>C. gallina</i>                    | Spring              | 6-10                   | A                       | Sea    | > 200                  | 40 | 36   | 30   | 34   | 3    |
| Vi_56              | V. parahaemolyticus        | V. harveyi group                 | <i>V. philippinarum</i>              | Spring              | 11-15                  | B                       | Lagoon | > 200                  | 41 | 37   | 31   | 35   | 29   |
| Vi_57              | V. fluvialis               | V. anguillarum                   | <i>V. philippinarum</i>              | Spring              | 16-20                  | B                       | Lagoon | 101 - 200              | 42 | 3    | 4    | 36   | 3    |
| Vi_58              | V. fluvialis               | V. anguillarum                   | <i>V. philippinarum</i>              | Spring              | 11-15                  | B                       | Lagoon | > 200                  | 43 | 38   | 11   | 37   | 30   |
| Vi_59              | V. fluvialis               | V. anguillarum                   | <i>V. philippinarum</i>              | Spring              | 16-20                  | B                       | Lagoon | 101 - 200              | 3  | 3    | 3    | 3    | 3    |

|        |                     |                                  |                      |        |       |   |        |           |    |    |    |    |    |
|--------|---------------------|----------------------------------|----------------------|--------|-------|---|--------|-----------|----|----|----|----|----|
| Vi_60  | V. splendidus II    | V. fischeri                      | V. philippinarum     | Spring | 6-10  | B | Lagoon | 0 - 100   | 44 | 39 | 32 | 38 | 31 |
| Vi_61  | V. parahaemolyticus | V. splendidus                    | V. philippinarum     | Spring | 6-10  | B | Lagoon | 0 - 100   | 45 | 40 | 33 | 32 | 32 |
| Vi_62  | V. anguillarum like | Vi 20 group                      | M. galloprovincialis | Spring | 11-15 | A | Sea    | > 200     | 46 | 41 | 34 | 32 | 28 |
| Vi_63  | V. vulnificus B2    | V. alginolyticus / V. diabolicus | M. galloprovincialis | Spring | 11-15 | A | Sea    | > 200     | 47 | 42 | 20 | 39 | 33 |
| Vi_64  | V. parahaemolyticus | V. harveyi group                 | P. lividus           | Spring | 16-20 | B | Lagoon | > 200     | 48 | 43 | 22 | 40 | 34 |
| Vi_66  | V. parahaemolyticus | V. harveyi group                 | V. philippinarum     | Spring | 16-20 | B | Lagoon | 0 - 100   | 48 | 43 | 22 | 40 | 34 |
| Vi_67  | V. anguillarum like | V. orientalis                    | V. philippinarum     | Spring | 16-20 | B | Lagoon | 0 - 100   | 49 | 44 | 35 | 41 | 35 |
| Vi_68  | V. parahaemolyticus | V. parahaemolyticus              | V. philippinarum     | Spring | 6-10  | B | Lagoon | 0 - 100   | 50 | 45 | 36 | 42 | 36 |
| Vi_69  | V. harveyi          | V. harveyi group                 | V. philippinarum     | Spring | 16-20 | B | Lagoon | 101 - 200 | 51 | 28 | 24 | 26 | 24 |
| Vi_70  | V. alginolyticus    | V. alginolyticus / V. diabolicus | V. philippinarum     | Spring | 16-20 | B | Lagoon | 101 - 200 | 52 | 17 | 19 | 43 | 37 |
| Vi_71  | V. parahaemolyticus | V. parahaemolyticus              | V. philippinarum     | Spring | 11-15 | B | Lagoon | 0 - 100   | 53 | 45 | 37 | 44 | 19 |
| Vi_72  | V. alginolyticus    | V. anguillarum                   | V. philippinarum     | Spring | 11-15 | B | Lagoon | 0 - 100   | 54 | 12 | 4  | 45 | 4  |
| Vi_73  | V. harveyi          | Vi 20 group                      | V. philippinarum     | Spring | 11-15 | B | Lagoon | 0 - 100   | 55 | 46 | 38 | 33 | 28 |
| Vi_74  | V. logei            | V. harveyi group                 | V. philippinarum     | Spring | 6-10  | B | Lagoon | 101 - 200 | 33 | 28 | 24 | 28 | 24 |
| Vi_79  | V. anguillarum like | V. splendidus                    | V. philippinarum     | Spring | 16-20 | B | Lagoon | 101 - 200 | 56 | 47 | 39 | 46 | 38 |
| Vi_80  | V. fischeri         | V. alginolyticus / V. diabolicus | V. philippinarum     | Spring | 16-20 | B | Lagoon | 101 - 200 | 57 | 30 | 19 | 47 | 23 |
| Vi_81  | V. parahaemolyticus | V. parahaemolyticus              | V. philippinarum     | Spring | 16-20 | B | Lagoon | 0 - 100   | 58 | 48 | 40 | 48 | 39 |
| Vi_1a  | V. alginolyticus    | V. alginolyticus / V. diabolicus | V. philippinarum     | Spring | 16-20 | B | Lagoon | 0 - 100   | 59 | 49 | 15 | 49 | 40 |
| Vi_2a  | V. mimicus          | V. fischeri                      | V. philippinarum     | Spring | 16-20 | B | Lagoon | 0 - 100   | 60 | 50 | 41 | 50 | 41 |
| Vi_3a  | V. parahaemolyticus | V. parahaemolyticus              | M. galloprovincialis | Spring | 11-15 | A | Sea    | > 200     | 61 | 51 | 21 | 51 | 39 |
| Vi_4a  | V. parahaemolyticus | V. parahaemolyticus              | M. galloprovincialis | Spring | 11-15 | A | Sea    | > 200     | 62 | 52 | 36 | 52 | 19 |
| Vi_5a  | V. alginolyticus    | V. alginolyticus / V. diabolicus | V. philippinarum     | Spring | 16-20 | B | Lagoon | > 200     | 63 | 53 | 19 | 47 | 18 |
| Vi_6a  | V. parahaemolyticus | V. parahaemolyticus              | V. philippinarum     | Spring | 16-20 | B | Lagoon | 0 - 100   | 64 | 54 | 36 | 53 | 42 |
| Vi_7a  | V. fluvialis        | V. orientalis                    | V. philippinarum     | Spring | 16-20 | B | Lagoon | > 200     | 65 | 55 | 42 | 54 | 43 |
| Vi_8a  | V. alginolyticus    | V. alginolyticus / V. diabolicus | V. philippinarum     | Spring | 16-20 | B | Lagoon | > 200     | 66 | 56 | 19 | 55 | 44 |
| Vi_9a  | V. anguillarum like | Vi 20 group                      | M. galloprovincialis | Spring | 11-15 | A | Sea    | > 200     | 67 | 57 | 27 | 56 | 28 |
| Vi_10a | V. vulnificus B2    | V. harveyi group                 | V. philippinarum     | Spring | 16-20 | B | Lagoon | > 200     | 30 | 28 | 24 | 26 | 22 |
| Vi_11a | V. vulnificus B2    | V. harveyi group                 | V. philippinarum     | Spring | 16-20 | B | Lagoon | > 200     | 68 | 58 | 43 | 57 | 45 |
| Vi_12a | V. vulnificus B2    | V. harveyi group                 | V. philippinarum     | Spring | 11-15 | B | Lagoon | 101 - 200 | 69 | 59 | 44 | 29 | 46 |
| Vi_13a | V. vulnificus B2    | V. alginolyticus / V. diabolicus | V. philippinarum     | Spring | 11-15 | B | Lagoon | 101 - 200 | 70 | 60 | 19 | 58 | 47 |
| Vi_14a | V. vulnificus B2    | V. alginolyticus / V. diabolicus | V. philippinarum     | Spring | 11-15 | B | Lagoon | 101 - 200 | 71 | 61 | 45 | 59 | 16 |
| Vi_15a | V. vulnificus B2    | V. mediterranei / V. shilonii    | V. philippinarum     | Spring | 16-20 | B | Lagoon | 0 - 100   | 72 | 7  | 46 | 7  | 7  |
| Vi_16a | V. splendidus II    | Vi 20 group                      | V. philippinarum     | Spring | 16-20 | B | Lagoon | 0 - 100   | 73 | 62 | 8  | 9  | 9  |
| Vi_17a | V. alginolyticus    | V. alginolyticus / V. diabolicus | V. philippinarum     | Spring | 16-20 | B | Lagoon | 0 - 100   | 74 | 15 | 47 | 60 | 48 |
| Vi_18a | V. parahaemolyticus | V. parahaemolyticus              | V. philippinarum     | Spring | 21-30 | B | Lagoon | 0 - 100   | 75 | 63 | 48 | 44 | 36 |
| Vi_19a | V. alginolyticus    | V. alginolyticus / V. diabolicus | V. philippinarum     | Spring | 21-30 | B | Lagoon | 0 - 100   | 76 | 64 | 49 | 59 | 16 |
| Vi_20a | V. alginolyticus    | V. alginolyticus / V. diabolicus | Cerastoderma spp     | Spring | 21-30 | B | Lagoon | 0 - 100   | 77 | 65 | 15 | 61 | 18 |
| Vi_21a | V. parahaemolyticus | V. parahaemolyticus              | Cerastoderma spp     | Spring | 21-30 | B | Lagoon | 0 - 100   | 78 | 66 | 21 | 62 | 36 |
| Vi_22a | V. parahaemolyticus | V. parahaemolyticus              | V. philippinarum     | Spring | 16-20 | B | Lagoon | 0 - 100   | 79 | 67 | 50 | 44 | 49 |
| Vi_23a | V. mediterranei     | V. mediterranei / V. shilonii    | V. philippinarum     | Spring | 16-20 | B | Lagoon | 0 - 100   | 72 | 7  | 46 | 7  | 7  |
| Vi_24a | V. mimicus          | Vi 24a group                     | V. philippinarum     | Spring | 21-30 | B | Lagoon | 101 - 200 | 80 | 68 | 51 | 63 | 50 |
| Vi_25a | V. parahaemolyticus | V. parahaemolyticus              | Cerastoderma spp     | Spring | 21-30 | B | Lagoon | 0 - 100   | 78 | 66 | 21 | 62 | 36 |
| Vi_26a | V. parahaemolyticus | V. parahaemolyticus              | V. philippinarum     | Spring | 21-30 | B | Lagoon | 0 - 100   | 75 | 63 | 48 | 44 | 36 |
| Vi_27a | V. parahaemolyticus | V. parahaemolyticus              | V. philippinarum     | Spring | 21-30 | B | Lagoon | 101 - 200 | 81 | 69 | 49 | 64 | 51 |
| Vi_28a | V. alginolyticus    | V. alginolyticus / V. diabolicus | V. philippinarum     | Spring | 21-30 | B | Lagoon | 101 - 200 | 82 | 70 | 15 | 61 | 17 |
| Vi_29a | V. parahaemolyticus | V. parahaemolyticus              | V. philippinarum     | Spring | 16-20 | B | Lagoon | 0 - 100   | 83 | 54 | 36 | 65 | 42 |
| Vi_30a | V. marinus          | V. alginolyticus / V. diabolicus | V. philippinarum     | Spring | 16-20 | B | Lagoon | 0 - 100   | 84 | 71 | 15 | 66 | 52 |
| Vi_31a | V. mediterranei     | V. mediterranei / V. shilonii    | V. philippinarum     | Spring | 16-20 | B | Lagoon | 0 - 100   | 85 | 7  | 52 | 67 | 7  |
| Vi_32a | V. vulnificus       | V. harveyi group                 | M. galloprovincialis | Spring | 21-30 | B | Lagoon | 101 - 200 | 86 | 72 | 53 | 68 | 45 |
| Vi_33a | V. alginolyticus    | V. alginolyticus / V. diabolicus | M. galloprovincialis | Spring | 21-30 | B | Lagoon | 101 - 200 | 87 | 17 | 17 | 22 | 16 |
| Vi_34a | V. alginolyticus    | V. alginolyticus / V. diabolicus | M. galloprovincialis | Spring | 21-30 | B | Lagoon | > 200     | 20 | 18 | 17 | 18 | 16 |
| Vi_35a | V. fischeri         | V. alginolyticus / V. diabolicus | M. galloprovincialis | Spring | 21-30 | B | Lagoon | > 200     | 88 | 73 | 54 | 69 | 53 |
| Vi_36a | V. alginolyticus    | V. alginolyticus / V. diabolicus | M. galloprovincialis | Spring | 21-30 | B | Lagoon | 0 - 100   | 89 | 74 | 17 | 70 | 16 |
| Vi_37a | V. parahaemolyticus | V. parahaemolyticus              | V. philippinarum     | Spring | 21-30 | B | Lagoon | > 200     | 90 | 75 | 55 | 71 | 19 |
| Vi_38a | V. nereis           | V. brasiliensis                  | M. galloprovincialis | Spring | 21-30 | B | Lagoon | 0 - 100   | 91 | 76 | 56 | 72 | 54 |
| Vi_39a | V. vulnificus       | V. harveyi group                 | M. galloprovincialis | Spring | 21-30 | B | Lagoon | 0 - 100   | 92 | 77 | 57 | 35 | 45 |
| Vi_40a | V. anguillarum like | V. alginolyticus / V. diabolicus | C. gallina           | Spring | 21-30 | B | Lagoon | > 200     | 93 | 78 | 20 | 22 | 55 |
| Vi_41a | V. vulnificus       | V. harveyi group                 | M. galloprovincialis | Spring | 21-30 | B | Lagoon | 0 - 100   | 94 | 79 | 58 | 73 | 45 |
| Vi_42a | V. logei            | V. harveyi group                 | M. galloprovincialis | Spring | 21-30 | B | Lagoon | 0 - 100   | 95 | 80 | 59 | 74 | 56 |
| Vi_43a | V. alginolyticus    | V. alginolyticus / V. diabolicus | V. philippinarum     | Spring | 16-20 | B | Lagoon | 101 - 200 | 96 | 42 | 17 | 69 | 16 |
| Vi_44a | V. campbelli        | V. parahaemolyticus              | V. philippinarum     | Spring | 16-20 | B | Lagoon | 101 - 200 | 97 | 81 | 36 | 75 | 57 |
| Vi_45a | V. vulnificus       | V. harveyi group                 | V. philippinarum     | Spring | 21-30 | B | Lagoon | 101 - 200 | 98 | 82 | 22 | 76 | 58 |

|                    |                     |                                  |                                      |        |       |   |        |           |     |     |    |     |    |
|--------------------|---------------------|----------------------------------|--------------------------------------|--------|-------|---|--------|-----------|-----|-----|----|-----|----|
| Vi_46a             | V. parahaemolyticus | V. parahaemolyticus              | <i>C. gallina</i>                    | Spring | 16-20 | B | Lagoon | > 200     | 99  | 48  | 60 | 77  | 59 |
| Vi_47a             | V. parahaemolyticus | V. parahaemolyticus              | <i>C. gallina</i>                    | Spring | 21-30 | B | Lagoon | > 200     | 100 | 83  | 36 | 78  | 60 |
| Vi_48a             | V. fischeri         | V. alginolyticus / V. diabolicus | <i>C. gallina</i>                    | Spring | 21-30 | B | Lagoon | > 200     | 101 | 84  | 20 | 79  | 16 |
| Vi_49a             | V. mediterranei     | V. mediterranei / V. shilonii    | <i>V. philippinarum</i>              | Spring | 21-30 | B | Lagoon | 0 - 100   | 102 | 85  | 61 | 80  | 61 |
| Vi_50a             | V. harveyi          | V. chagasii                      | <i>M. galloprovincialis</i>          | Spring | 16-20 | A | Sea    | > 200     | 103 | 86  | 62 | 81  | 62 |
| Vi_51a             | V. pelagius I       | V. chagasii                      | <i>V. philippinarum</i>              | Spring | 21-30 | B | Lagoon | 0 - 100   | 104 | 87  | 63 | 82  | 63 |
| Vi_52a             | V. parahaemolyticus | V. parahaemolyticus              | <i>M. galloprovincialis</i>          | Spring | 16-20 | B | Lagoon | > 200     | 105 | 88  | 21 | 44  | 19 |
| Vi_53a             | V. mediterranei     | Vi 24a group                     | <i>V. philippinarum</i>              | Summer | 21-30 | B | Lagoon | 0 - 100   | 106 | 89  | 64 | 83  | 64 |
| Vi_54a             | V. parahaemolyticus | V. harveyi group                 | <i>V. philippinarum</i>              | Summer | 21-30 | B | Lagoon | 0 - 100   | 107 | 90  | 65 | 84  | 65 |
| Vi_55a             | V. parahaemolyticus | V. harveyi group                 | <i>V. philippinarum</i>              | Summer | 21-30 | B | Lagoon | 0 - 100   | 108 | 26  | 66 | 85  | 65 |
| Vi_56a             | V. parahaemolyticus | V. harveyi group                 | <i>M. galloprovincialis</i>          | Summer | 21-30 | A | Sea    | > 200     | 109 | 90  | 67 | 86  | 56 |
| Vi_57a             | V. mediterranei     | V. mediterranei / V. shilonii    | <i>M. galloprovincialis</i>          | Summer | 21-30 | A | Sea    | > 200     | 110 | 7   | 68 | 7   | 7  |
| Vi_58a             | V. pelagius I       | Vi 58a                           | <i>M. galloprovincialis</i>          | Summer | 21-30 | A | Sea    | > 200     | 111 | 91  | 69 | 87  | 66 |
| Vi_59a             | V. mediterranei     | V. mediterranei / V. shilonii    | <i>V. philippinarum</i>              | Summer | 21-30 | B | Lagoon | 0 - 100   | 112 | 92  | 70 | 88  | 67 |
| Vi_60a             | V. splendidus II    | V. chagasii                      | <i>M. galloprovincialis</i>          | Summer | 21-30 | A | Sea    | > 200     | 113 | 93  | 71 | 89  | 62 |
| Vi_62a             | V. harveyi          | V. harveyi group                 | <i>M. galloprovincialis</i>          | Summer | 21-30 | A | Sea    | > 200     | 114 | 94  | 72 | 90  | 68 |
| Vi_63a             | V. splendidus II    | V. mediterranei / V. shilonii    | <i>V. philippinarum</i>              | Summer | 21-30 | B | Lagoon | > 200     | 115 | 95  | 73 | 91  | 69 |
| Vi_64a             | V. mediterranei     | V. mediterranei / V. shilonii    | <i>M. galloprovincialis</i>          | Summer | 21-30 | A | Sea    | > 200     | 116 | 96  | 74 | 80  | 70 |
| Vi_65a             | V. mediterranei     | V. mediterranei / V. shilonii    | <i>Callista chione</i>               | Summer | 21-30 | A | Sea    | > 200     | 117 | 97  | 75 | 88  | 71 |
| Vi_67a             | V. mediterranei     | V. mediterranei / V. shilonii    | <i>M. galloprovincialis</i>          | Summer | 21-30 | B | Lagoon | > 200     | 118 | 97  | 76 | 92  | 72 |
| Vi_68a             | V. fluvialis        | V. fluvialis / V. furnissii      | <i>M. galloprovincialis</i>          | Summer | 21-30 | B | Lagoon | > 200     | 119 | 98  | 77 | 93  | 73 |
| Vi_69a             | V. anguillarum like | V. orientalis                    | <i>M. galloprovincialis</i>          | Summer | 21-30 | B | Lagoon | > 200     | 120 | 55  | 42 | 94  | 74 |
| Vi_70a             | V. mediterranei     | Vi 70a group                     | <i>V. philippinarum</i>              | Summer | 21-30 | B | Lagoon | 101 - 200 | 121 | 99  | 78 | 95  | 75 |
| Vi_71a             | V. mediterranei     | V. mediterranei / V. shilonii    | <i>V. philippinarum</i>              | Summer | 21-30 | B | Lagoon | 101 - 200 | 122 | 100 | 79 | 88  | 71 |
| Vi_72a             | V. harveyi          | V. harveyi group                 | <i>V. philippinarum</i>              | Summer | 21-30 | B | Lagoon | 0 - 100   | 123 | 101 | 59 | 74  | 76 |
| Vi_73a             | V. harveyi          | V. harveyi group                 | <i>V. philippinarum</i>              | Summer | 21-30 | B | Lagoon | 0 - 100   | 123 | 101 | 59 | 74  | 76 |
| Vi_74a             | V. parahaemolyticus | V. parahaemolyticus              | <i>V. philippinarum</i>              | Summer | 21-30 | B | Lagoon | 101 - 200 | 124 | 102 | 40 | 96  | 19 |
| Vi_75a             | V. parahaemolyticus | V. parahaemolyticus              | <i>V. philippinarum</i>              | Summer | 21-30 | B | Lagoon | 0 - 100   | 125 | 103 | 40 | 97  | 19 |
| Vi_76a             | V. parahaemolyticus | V. parahaemolyticus              | <i>CrassO. gigas</i>                 | Summer | 21-30 | B | Lagoon | 0 - 100   | 125 | 103 | 40 | 97  | 19 |
| Vi_77a             | V. parahaemolyticus | V. parahaemolyticus              | <i>Cerastoderma</i> spp              | Summer | 21-30 | B | Sea    | 0 - 100   | 125 | 103 | 40 | 97  | 19 |
| Vi_78a             | V. vulnificus       | V. vulnificus                    | <i>V. philippinarum</i>              | Summer | 21-30 | A | Sea    | > 200     | 126 | 104 | 80 | 98  | 77 |
| Vi_79a             | V. mediterranei     | Vi 70a group                     | <i>V. philippinarum</i>              | Summer | 21-30 | B | Lagoon | 0 - 100   | 127 | 105 | 81 | 99  | 75 |
| Vi_80a             | V. logei            | V. harveyi group                 | <i>Ensis</i> spp./ <i>Solen</i> spp. | Autumn | 16-20 | B | Sea    | > 200     | 128 | 106 | 82 | 84  | 21 |
| Vi_81a             | V. mediterranei     | V. mediterranei / V. shilonii    | <i>V. philippinarum</i>              | Summer | 21-30 | B | Lagoon | 0 - 100   | 129 | 95  | 83 | 88  | 71 |
| Vi_1b <sup>c</sup> | V. parahaemolyticus | V. parahaemolyticus              | -                                    | -      | -     | - | -      | -         | 125 | 103 | 40 | 97  | 19 |
| Vi_2b              | V. mimicus          | V. chagasii                      | <i>V. philippinarum</i>              | Autumn | 16-20 | B | Lagoon | 0 - 100   | 130 | 107 | 84 | 100 | 78 |
| Vi_3b              | V. splendidus II    | V. chagasii                      | <i>V. philippinarum</i>              | Autumn | 16-20 | B | Lagoon | 0 - 100   | 131 | 108 | 85 | 101 | 62 |
| Vi_4b              | V. anguillarum      | V. harveyi group                 | <i>V. philippinarum</i>              | Autumn | 16-20 | B | Lagoon | 0 - 100   | 132 | 26  | 22 | 102 | 34 |
| Vi_5b              | V. splendidus II    | V. chagasii                      | <i>M. galloprovincialis</i>          | Autumn | 16-20 | A | Sea    | > 200     | 133 | 109 | 62 | 103 | 79 |
| Vi_6b              | V. pelagius I       | V. chagasii                      | <i>V. philippinarum</i>              | Autumn | 16-20 | B | Lagoon | 101 - 200 | 134 | 93  | 85 | 104 | 62 |
| Vi_7b              | V. splendidus II    | V. chagasii                      | <i>V. philippinarum</i>              | Autumn | 16-20 | B | Lagoon | 101 - 200 | 135 | 93  | 71 | 101 | 62 |
| Vi_8b              | V. logei            | V. harveyi group                 | <i>V. philippinarum</i>              | Autumn | 16-20 | B | Lagoon | 101 - 200 | 95  | 80  | 59 | 74  | 56 |
| Vi_9b              | V. anguillarum like | V. mediterranei / V. shilonii    | <i>Cerastoderma</i> spp              | Autumn | 16-20 | B | Lagoon | 0 - 100   | 136 | 110 | 86 | 105 | 72 |
| Vi_10b             | V. alginolyticus    | V. alginolyticus / V. diabolicus | <i>M. galloprovincialis</i>          | Autumn | 11-15 | A | Sea    | > 200     | 137 | 111 | 87 | 106 | 14 |

### Reference/Type strains

|                         |                     |                                  |  |  |  |  |  |  |     |     |     |     |    |
|-------------------------|---------------------|----------------------------------|--|--|--|--|--|--|-----|-----|-----|-----|----|
| 1DA3 <sup>d</sup>       | V. harveyi          | V. harveyi group                 |  |  |  |  |  |  | 152 | 125 | 100 | 120 | 89 |
| 40B <sup>d</sup>        | V. alginolyticus    | V. alginolyticus / V. diabolicus |  |  |  |  |  |  | 139 | 42  | 17  | 108 | 16 |
| 775 <sup>d</sup>        | V. anguillarum      | V. anguillarum                   |  |  |  |  |  |  | 140 | 113 | 88  | 109 | 80 |
| ATCC 14126 <sup>T</sup> | V. harveyi          | V. harveyi group                 |  |  |  |  |  |  | 149 | 122 | 97  | 117 | 34 |
| ATCC 17749 <sup>T</sup> | V. alginolyticus    | V. alginolyticus / V. diabolicus |  |  |  |  |  |  | 138 | 112 | 20  | 107 | 16 |
| ATCC 17802 <sup>T</sup> | V. parahaemolyticus | V. parahaemolyticus              |  |  |  |  |  |  | 125 | 103 | 40  | 97  | 19 |
| ATCC 27562 <sup>T</sup> | V. vulnificus       | V. vulnificus                    |  |  |  |  |  |  | 126 | 104 | 80  | 98  | 77 |
| ATCC 33809 <sup>T</sup> | V. fluvialis        | V. fluvialis / V. furnissii      |  |  |  |  |  |  | 147 | 120 | 95  | 115 | 86 |
| ATCC 43305              | V. anguillarum      | V. anguillarum                   |  |  |  |  |  |  | 140 | 113 | 88  | 109 | 80 |
| ATCC 43996              | V. parahaemolyticus | V. parahaemolyticus              |  |  |  |  |  |  | 157 | 129 | 103 | 124 | 42 |
| BAA-1116 <sup>d</sup>   | V. harveyi          | V. harveyi group                 |  |  |  |  |  |  | 150 | 123 | 98  | 118 | 88 |
| CECT 523 <sup>T</sup>   | V. campbellii       | V. harveyi group                 |  |  |  |  |  |  | 142 | 115 | 90  | 111 | 65 |
| CECT 621 <sup>T</sup>   | V. mediterranei     | V. mediterranei / V. shilonii    |  |  |  |  |  |  | 153 | 95  | 79  | 88  | 72 |
| CECT 629 <sup>T</sup>   | V. orientalis       | V. orientalis                    |  |  |  |  |  |  | 155 | 127 | 42  | 122 | 91 |

|                           |                                 |                                                |     |     |     |     |    |
|---------------------------|---------------------------------|------------------------------------------------|-----|-----|-----|-----|----|
| ES114 <sup>d</sup>        | <i>V. fischeri</i>              | <i>V. fischeri</i>                             | 146 | 119 | 94  | 114 | 85 |
| HY01 <sup>d</sup>         | <i>V. harveyi</i>               | <i>V. harveyi</i> group                        | 151 | 124 | 99  | 119 | 65 |
| LGP 32 <sup>d</sup>       | <i>V. splendidus</i>            | <i>V. splendidus</i>                           | 162 | 134 | 107 | 128 | 96 |
| LMG 19031 <sup>T</sup>    | <i>V. splendidus</i>            | <i>V. splendidus</i>                           | 161 | 133 | 106 | 127 | 95 |
| LMG 19703 <sup>T</sup>    | <i>V. shilonii</i>              | <i>V. mediterranei</i> / <i>V. shilonii</i>    | 160 | 132 | 105 | 126 | 94 |
| LMG 20546 <sup>T</sup>    | <i>V. brasiliensis</i>          | <i>V. brasiliensis</i>                         | 141 | 114 | 89  | 110 | 81 |
| LMG 21353 <sup>T</sup>    | <i>V. chagasii</i>              | <i>V. chagasii</i>                             | 143 | 116 | 91  | 112 | 82 |
| LMG 21460 <sup>T</sup>    | <i>V. rotiferanius</i>          | <i>V. harveyi</i> group                        | 159 | 131 | 67  | 125 | 93 |
| LMG 23867                 | <i>V. diabolicus</i>            | <i>V. alginolyticus</i> / <i>V. diabolicus</i> | 145 | 118 | 93  | 61  | 84 |
| LMG 25443 <sup>T</sup>    | <i>V. owensii</i>               | <i>V. harveyi</i> group                        | 156 | 128 | 102 | 123 | 92 |
| NCTC 11218 <sup>d</sup>   | <i>V. furnissii</i>             | <i>V. fluvialis</i> / <i>V. furnissii</i>      | 148 | 121 | 96  | 116 | 87 |
| O1 N16961 <sup>d</sup>    | <i>V. cholerae</i>              | <i>V. cholerae</i> / <i>V. mimicus</i>         | 144 | 117 | 92  | 113 | 83 |
| RIMD 2210633 <sup>d</sup> | <i>V. parahaemolyticus</i>      | <i>V. parahaemolyticus</i>                     | 158 | 130 | 104 | 62  | 19 |
| VM603 <sup>d</sup>        | <i>V. mimicus</i>               | <i>V. cholerae</i> / <i>V. mimicus</i>         | 154 | 126 | 101 | 121 | 90 |
| SS9 <sup>d</sup>          | <i>Photobacterium profundum</i> |                                                | 163 | 135 | 108 | 129 | 97 |
